# Supplementary material
Source: Springer Nature journal article supplement (https://www.springermedizin.de/resource/supplementary/12974_2014_991_MOESM4_ESM.pdf/9600576)

**A** Neuron - microglia cocultures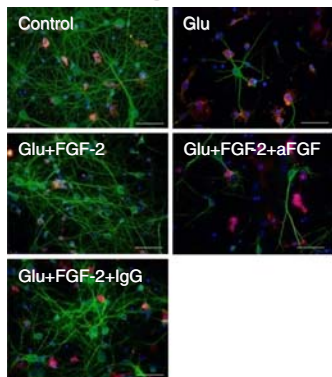**B**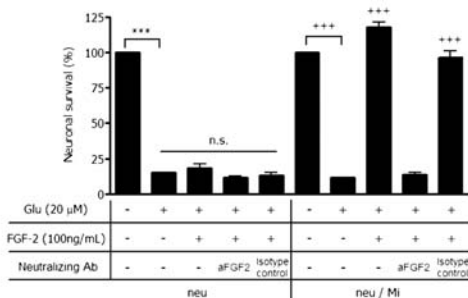**Neuronal cultures**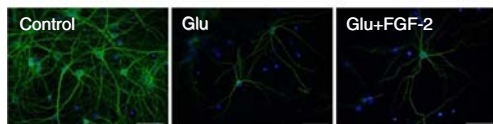**C**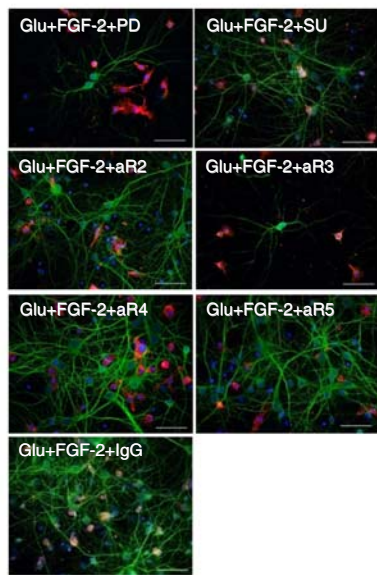**D**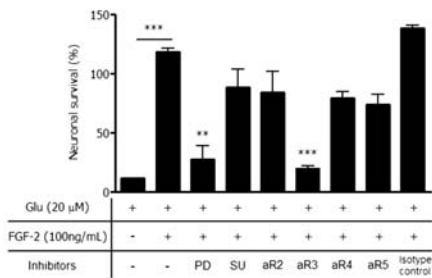

Supplement: MOESM4 [file 9600576]
